# Supplementary material
Source: publisher figshare collection journal article supplement (https://diabetesjournals.figshare.com/ndownloader/files/26669390)
Supplement: Supplementary file 1 [file 26669390]

## Online-Only Supplementary Material

Table S1. Main characteristics of patients starting FreeStyle Libre system from August 1<sup>st</sup> 2017

|                                                                                      | Type 1 diabetes       | Type 2 diabetes       | Total                |
|--------------------------------------------------------------------------------------|-----------------------|-----------------------|----------------------|
| <b>Number of patients</b>                                                            | <b>33 165 (44.8%)</b> | <b>40 846 (55.2%)</b> | <b>74 011 (100%)</b> |
| Age                                                                                  |                       |                       |                      |
| Mean (SD)                                                                            | 36.6 (19.4)           | 59.3 (15.4)           | 49.1 (20.7)          |
| Median / Min / Max                                                                   | 35.0 / 1.0 / 97.0     | 62.0 / 18.0 / 99.0    | 52.0 / 1.0 / 99.0    |
| Quartile 25 / Quartile 75                                                            | 19.0 / 51.0           | 51.0 / 70.0           | 33.0 / 66.0          |
| Age (by class)                                                                       |                       |                       |                      |
| < 8 yrs                                                                              | 1 049 (3.2%)          | --                    | 1 049 (1.4%)         |
| [8-15] yrs                                                                           | 3 709 (11.2%)         | --                    | 3 709 (5.0%)         |
| [16-25] yrs                                                                          | 6 109 (18.4%)         | 1 316 (3.2%)          | 7 425 (10.0%)        |
| [26-45] yrs                                                                          | 10 610 (32.0%)        | 5 485 (13.4%)         | 16 095 (21.7%)       |
| [46-65] yrs                                                                          | 8 442 (25.5%)         | 16 897 (41.4%)        | 25 339 (34.2%)       |
| [66-75] yrs                                                                          | 2 405 (7.3%)          | 11 141 (27.3%)        | 13 546 (18.3%)       |
| >75 yrs                                                                              | 841 (2.5%)            | 6 007 (14.7%)         | 6 848 (9.3%)         |
| Gender                                                                               |                       |                       |                      |
| Male                                                                                 | 17 365 (52.4%)        | 23 097 (56.5%)        | 40 462 (54.7%)       |
| Female                                                                               | 15 800 (47.6%)        | 17 749 (43.5%)        | 33 549 (45.3%)       |
| At least one reimbursement covered by the special assurance for deprived people      |                       |                       |                      |
| No                                                                                   | 29 021 (87.5%)        | 36 567 (89.5%)        | 65 588 (88.6%)       |
| Yes                                                                                  | 4 144 (12.5%)         | 4 279 (10.5%)         | 8 423 (11.4%)        |
| Diabetes treatment in the 6 months before starting the <b>FreeStyle Libre</b> system |                       |                       |                      |
| Non-insulin diabetes treatment                                                       | 66 (0.2%)             | 1 873 (4.6%)          | 1 939 (2.6%)         |
| Insulin only                                                                         | 28 530 (86.0%)        | 19 323 (47.3%)        | 47 853 (64.7%)       |
| Insulin + Non-insulin diabetes treatment                                             | 2 439 (7.4%)          | 18 429 (45.1%)        | 20 868 (28.2%)       |
| ND                                                                                   | 2 130 (6.4%)          | 1 221 (3.0%)          | 3 351 (4.5%)         |
| Treatment Scheme in the 6 months before starting the <b>FreeStyle Libre</b> system   |                       |                       |                      |
| Pump                                                                                 | 10 967 (33.1%)        | 7 626 (18.7%)         | 18 593 (25.1%)       |
| MDI                                                                                  | 19 675 (59.3%)        | 27 153 (66.5%)        | 46 828 (63.3%)       |
| Basal insulin scheme                                                                 | --                    | 3 077 (7.5%)          | 3 077 (4.2%)         |
| Non-insulin diabetes treatment                                                       | --                    | 1 839 (4.5%)          | 1 839 (2.5%)         |
| ND                                                                                   | 2 523 (7.6%)          | 1 151 (2.8%)          | 3 674 (5.0%)         |

Abbreviations: MDI: ND: Oral Anti-diabetic Drugs

**Table S2. Number of acute diabetes complications per 1,000 patient years 12 months before and after starting FreeStyle Libre system**

|                                   | <b>Nature of acute diabetes complication</b> | <b>12 months before FreeStyle Libre initiation*</b> | <b>12 months after FreeStyle Libre initiation*</b> | <b>Change in number of events*</b> |
|-----------------------------------|----------------------------------------------|-----------------------------------------------------|----------------------------------------------------|------------------------------------|
| <b>Type 1 diabetes (n=33,165)</b> | Hospitalization for hypoglycemia             | 7.1                                                 | 6.8                                                | -0.3                               |
|                                   | Hospitalization for coma                     | 2.8                                                 | 1.7                                                | -1.1                               |
|                                   | Hospitalization for DKA                      | 63.9                                                | 29.3                                               | -34.6                              |
|                                   | Hospitalization for hyperglycemia            | 1.5                                                 | 1.7                                                | +0.2                               |
|                                   | Hospitalization for at least one acute event | 65.4                                                | 33.6                                               | -31.8                              |
| <b>Type 2 diabetes (n=40,846)</b> | Hospitalization for hypoglycemia             | 7.6                                                 | 6.8                                                | -0.8                               |
|                                   | Hospitalization for coma                     | 2.5                                                 | 1.7                                                | -0.8                               |
|                                   | Hospitalization for DKA                      | 19.8                                                | 11.2                                               | -8.6                               |
|                                   | Hospitalization for hyperglycemia            | 1.2                                                 | 0.9                                                | -0.3                               |
|                                   | Hospitalization for at least one acute event | 27.5                                                | 16.8                                               | -10.7                              |
| <b>Total (n=74,011)</b>           | Hospitalization for hypoglycemia             | 7.3                                                 | 6.8                                                | -0.5                               |
|                                   | Hospitalization for coma                     | 2.6                                                 | 1.7                                                | -0.9                               |
|                                   | Hospitalization for DKA                      | 39.5                                                | 19.3                                               | -20.2                              |
|                                   | Hospitalization for hyperglycemia            | 1.4                                                 | 1.3                                                | -0.1                               |
|                                   | Hospitalization for at least one acute event | 44.5                                                | 24.3                                               | -20.2                              |

\* Data are number of events per 1,000 patient years in the 12 months before and after first prescription of FreeStyle Libre sensors.

Abbreviations : DKA, diabetic ketoacidosis

**Table S3. Number of patients with acute diabetes complications 12 months before and after starting FreeStyle Libre system according to age and gender**

| Age (years) | At least one hospitalization for: | Number of male patients (%)                 |                                            | Number of female patients (%)               |                                            |
|-------------|-----------------------------------|---------------------------------------------|--------------------------------------------|---------------------------------------------|--------------------------------------------|
|             |                                   | 12 months before FreeStyle Libre initiation | 12 months after FreeStyle Libre initiation | 12 months before FreeStyle Libre initiation | 12 months after FreeStyle Libre initiation |
| <25         | Hypoglycemia                      | 48 (0.78%)                                  | 54 (0.87%)                                 | 54 (0.90%)                                  | 52 (0.87%)                                 |
|             | Coma                              | 22 (0.36%)                                  | 11 (0.18%)                                 | 17 (0.28%)                                  | 16 (0.27%)                                 |
|             | DKA                               | 657 (10.64%)                                | 264 (4.27%)                                | 703 (11.70%)                                | 313 (5.21%)                                |
|             | Hyperglycemia                     | 17 (0.28%)                                  | 17 (0.28%)                                 | 19 (0.32%)                                  | 27 (0.45%)                                 |
|             | At least one acute event          | 724 (11.72%)                                | 333 (5.39%)                                | 776 (12.92%)                                | 393 (6.54%)                                |
| 25-45       | Hypoglycemia                      | 60 (0.75%)                                  | 61 (0.76%)                                 | 36 (0.45%)                                  | 52 (0.64%)                                 |
|             | Coma                              | 23 (0.29%)                                  | 18 (0.22%)                                 | 17 (0.21%)                                  | 8 (0.10%)                                  |
|             | DKA                               | 333 (4.15%)                                 | 134 (1.67%)                                | 289 (3.58%)                                 | 179 (2.22%)                                |
|             | Hyperglycemia                     | 12 (0.15%)                                  | 11 (0.14%)                                 | 18 (0.22%)                                  | 9 (0.11%)                                  |
|             | At least one acute event          | 416 (5.19%)                                 | 215 (2.68%)                                | 345 (4.27%)                                 | 241 (2.99%)                                |
| 46-65       | Hypoglycemia                      | 93 (0.64%)                                  | 82 (0.57%)                                 | 70 (0.64%)                                  | 57 (0.52%)                                 |
|             | Coma                              | 40 (0.28%)                                  | 23 (0.16%)                                 | 20 (0.18%)                                  | 14 (0.13%)                                 |
|             | DKA                               | 230 (1.59%)                                 | 94 (0.65%)                                 | 172 (1.58%)                                 | 87 (0.80%)                                 |
|             | Hyperglycemia                     | 10 (0.07%)                                  | 8 (0.26%)                                  | 8 (0.07%)                                   | 5 (0.05%)                                  |
|             | At least one acute event          | 363 (2.51%)                                 | 201 (1.39%)                                | 262 (2.40%)                                 | 157 (1.44%)                                |
| 66-75       | Hypoglycemia                      | 48 (0.59%)                                  | 33 (0.41%)                                 | 28 (0.52%)                                  | 27 (0.50%)                                 |
|             | Coma                              | 15 (0.18%)                                  | 13 (0.16%)                                 | 12 (0.22%)                                  | 3 (0.06%)                                  |
|             | DKA                               | 52 (0.64%)                                  | 19 (0.23%)                                 | 32 (0.59%)                                  | 14 (0.26%)                                 |
|             | Hyperglycemia                     | 3 (0.04%)                                   | 2 (0.02%)                                  | 5 (0.09%)                                   | 3 (0.06%)                                  |
|             | At least one acute event          | 116 (1.43%)                                 | 67 (0.82%)                                 | 74 (1.37%)                                  | 47 (0.87%)                                 |
| ≥75         | Hypoglycemia                      | 40 (1.08%)                                  | 27 (0.73%)                                 | 23 (0.73%)                                  | 23 (0.73%)                                 |
|             | Coma                              | 9 (0.24%)                                   | 7 (0.19%)                                  | 10 (0.32%)                                  | 6 (0.19%)                                  |
|             | DKA                               | 17 (0.46%)                                  | 12 (0.33%)                                 | 53 (0.73%)                                  | 12 (0.38%)                                 |
|             | Hyperglycemia                     | 5 (0.14%)                                   | 2 (0.05%)                                  | 3 (0.10%)                                   | 3 (0.10%)                                  |
|             | At least one acute event          | 69 (1.87%)                                  | 45 (1.22%)                                 | 59 (1.87%)                                  | 41 (1.30%)                                 |

\* Data are number (%) of patients with at least one hospitalization in the 12 months before and after first prescription of FreeStyle Libre sensors.

Abbreviations: DKA, diabetic ketoacidosis

**Table S4. Frequency of acute diabetes complications according to the period of time after starting the FreeStyle Libre system**

**(a) 3 months**

|                        | <b>Cumulative number of days</b> | <b>Hypoglycemia</b> | <b>Coma</b> | <b>DKA</b> | <b>Hyperglycemia</b> | <b>At least one acute event</b> |
|------------------------|----------------------------------|---------------------|-------------|------------|----------------------|---------------------------------|
| <b>Type 1 diabetes</b> | 2 983 364                        | 8.56                | 1.96        | 29.00      | 1.96                 | 39.40                           |
| <b>Type 2 diabetes</b> | 3 665 666                        | 7.97                | 2.39        | 12.15      | 0.80                 | 20.51                           |
| <b>Total</b>           | 6 649 030                        | 8.23                | 2.20        | 19.71      | 1.32                 | 28.98                           |

**(b) 6 months**

|                        | <b>Cumulative number of days</b> | <b>Hypoglycemia</b> | <b>Coma</b> | <b>DKA</b> | <b>Hyperglycemia</b> | <b>At least one acute event</b> |
|------------------------|----------------------------------|---------------------|-------------|------------|----------------------|---------------------------------|
| <b>Type 1 diabetes</b> | 5 964 346                        | 7.16                | 1.77        | 28.76      | 1.71                 | 35.92                           |
| <b>Type 2 diabetes</b> | 7 305 430                        | 7.54                | 2.10        | 11.24      | 0.70                 | 18.49                           |
| <b>Total</b>           | 13 269 776                       | 7.37                | 1.95        | 19.12      | 1.16                 | 26.32                           |

**(c) 12 months**

|                        | <b>Cumulative number of days</b> | <b>Hypoglycemia</b> | <b>Coma</b> | <b>DKA</b> | <b>Hyperglycemia</b> | <b>At least one acute event</b> |
|------------------------|----------------------------------|---------------------|-------------|------------|----------------------|---------------------------------|
| <b>Type 1 diabetes</b> | 12 086 332                       | 6.86                | 1.75        | 29.38      | 1.69                 | 33.67                           |
| <b>Type 2 diabetes</b> | 14 708 250                       | 6.87                | 1.71        | 11.39      | 0.92                 | 17.05                           |
| <b>Total</b>           | 26 794 582                       | 6.87                | 1.73        | 19.51      | 1.27                 | 24.55                           |

Data are frequency of hospitalization for diabetes acute events per 1,000 patients years over 3, 6 and 12 months after starting the FreeStyle Libre system.

**Table S5. Number of patients with acute diabetes complications 12 months before and after starting FreeStyle Libre for users on MDI and CSII therapy**

| Insulin therapy            | At least one hospitalization for: | Number of patients (%)                      |                                            |
|----------------------------|-----------------------------------|---------------------------------------------|--------------------------------------------|
|                            |                                   | 12 months before FreeStyle Libre initiation | 12 months after FreeStyle Libre initiation |
| <b>CSII<br/>(n=18,282)</b> | Hypoglycemia                      | 108 (0.59%)                                 | 105 (0.57%)                                |
|                            | Coma                              | 33 (0.18%)                                  | 27 (0.15%)                                 |
|                            | DKA                               | 471 (2.58%)                                 | 329 (1.8%)                                 |
|                            | Hyperglycemia                     | 28 (0.15%)                                  | 20 (0.11%)                                 |
|                            | At least one acute event          | 624 (3.41%)                                 | 474 (2.59%)                                |
| <b>MDI<br/>(n=43,041)</b>  | Hypoglycemia                      | 317 (0.74%)                                 | 282 (0.66%)                                |
|                            | Coma                              | 105 (0.24%)                                 | 65 (0.15%)                                 |
|                            | DKA                               | 1243 (2.89%)                                | 568 (1.32%)                                |
|                            | Hyperglycemia                     | 41 (0.10%)                                  | 49 (0.11%)                                 |
|                            | At least one acute event          | 1657 (3.85%)                                | 919 (2.14%)                                |

\* Data are number of events and % of patients with at least one hospitalization in the 12 months before and after first prescription of FreeStyle Libre sensors.

Abbreviations: DKA, diabetic ketoacidosis; Multiple daily insulin injections ; CSII, Continuous subcutaneous insulin infusion

**Table S6. Persistence with the FreeStyle Libre at 12 months after first use segregated by SMBG test strip acquisition and treatment with MDI or CSII**

| SMBG strip use | Persistence with FreeStyle Libre (% of users)* |                                 |                                 | Number of patients |
|----------------|------------------------------------------------|---------------------------------|---------------------------------|--------------------|
|                | All users                                      | On MDI                          | On CSII                         |                    |
| 0 strips       | 97.3% (95% CI 97.1, 97.6)                      | 97.4% (95% CI 97.1, 97.7)       | 96.9% (95% CI 96.2, 97.5)       | 19,396             |
| 1-3 strips     | 98.0% (95% CI 97.8, 98.2)                      | 97.9% (95% CI 97.6, 98.1)       | 97.9% (95% CI 97.4, 98.3)       | 17,682             |
| 4-5 strips     | 98.7% (95% CI 98.5, 98.8)                      | 98.8% (95% CI 98.6, 99.0)       | 98.6% (95% CI 98.2, 98.8)       | 21,374             |
| >5 strips      | 98.5% (95% CI 98.3, 98.7)                      | 98.4% (95% CI 98.1, 98.6)       | 98.8% (95% CI 98.5, 99.1)       | 15,559             |
| <b>Total</b>   | <b>98.1% (95% CI 98.0-98.2)</b>                | <b>98.2% (95% CI 98.0-98.3)</b> | <b>98.3% (95% CI 98.1-98.4)</b> | <b>74,011</b>      |

\* Data are % of patients (95% Confidence Interval) still receiving delivery of FreeStyle Libre sensors 12 months after their first prescription and delivery .

Abbreviations: MDI, Multiple daily insulin injections ; CSII, Continuous subcutaneous insulin infusion ; SMBG, Self monitored blood glucose
